# Supplementary material
Source: PubMed Central journal article supplement (PMC11159457)

**A.**

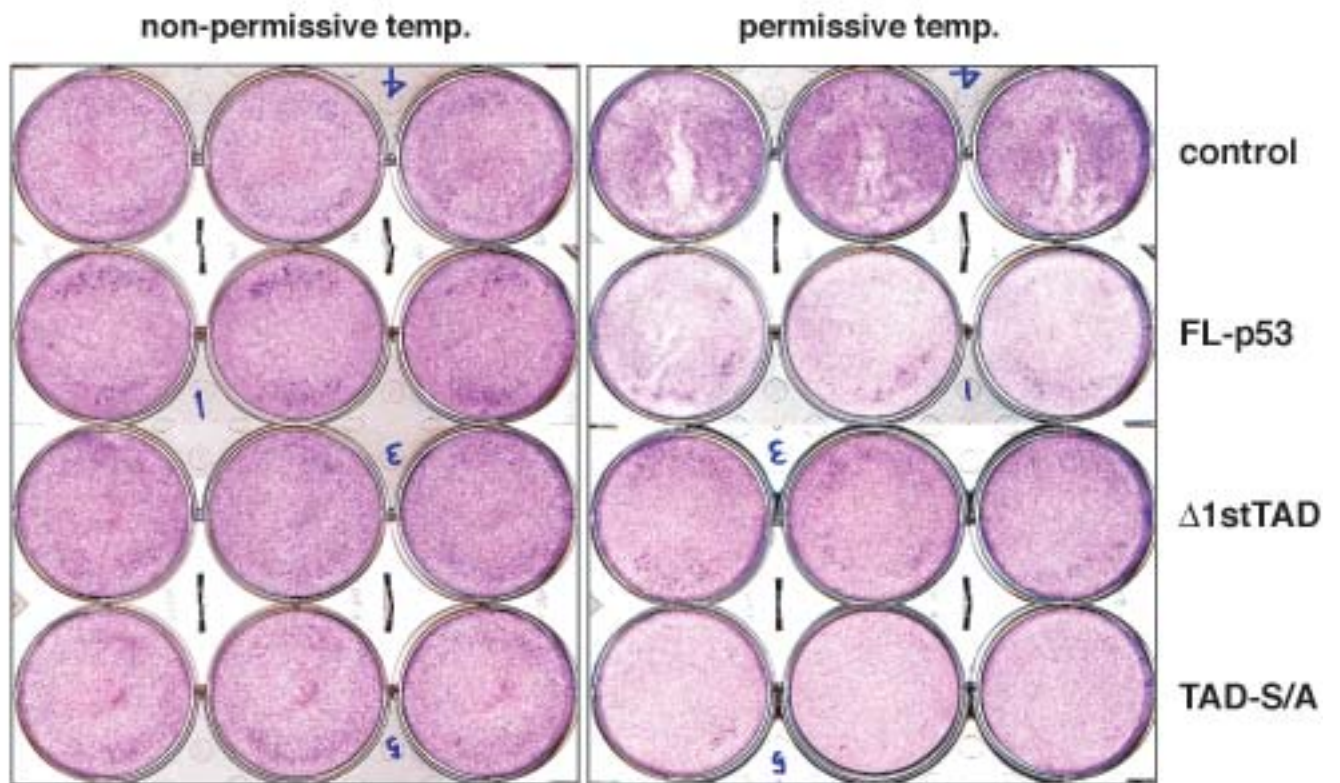

**B.**

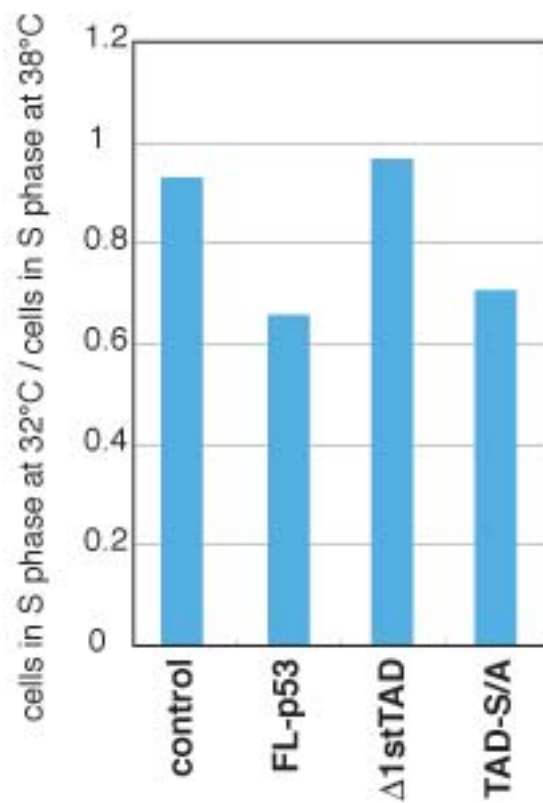

Supplement: CAS-98-189-s001.pdf [file CAS-98-189-s001.pdf]

**A.**

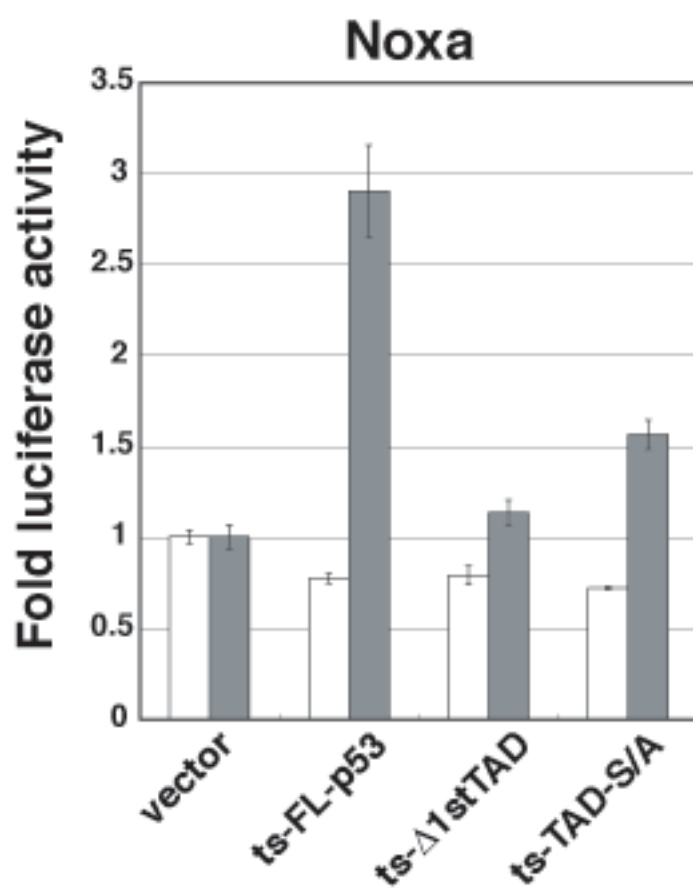

**B.**

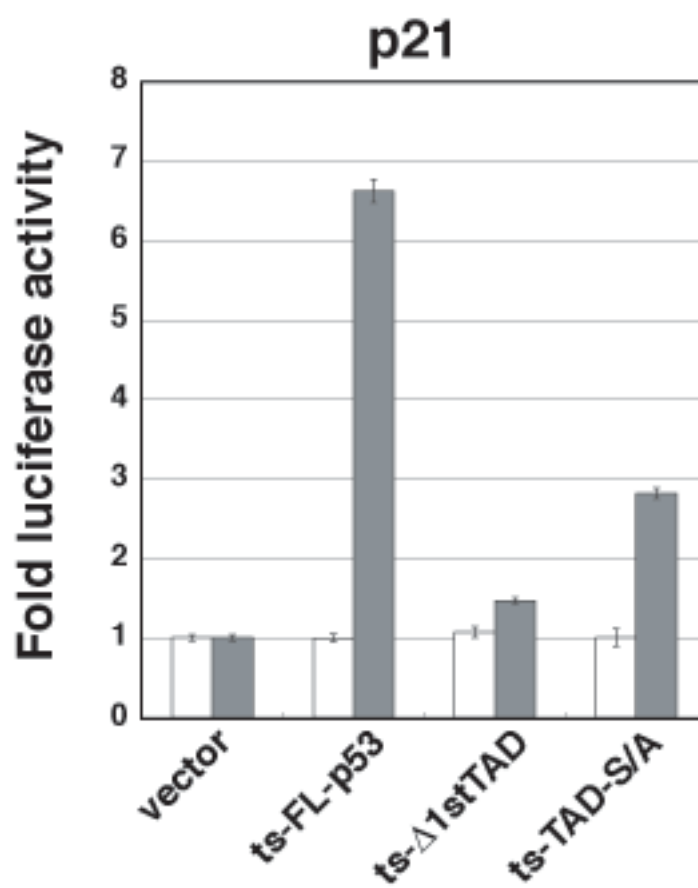

Supplement: CAS-98-189-s005.pdf [file CAS-98-189-s005.pdf]
